# Supplementary material for: Selecting strong Brønsted acid zeolites through screening from a database of hypothetical frameworks
Source: Royal Society of Chemistry journal article supplement (doi:10.1039/c7cp01778b), 2017-01-01
Supplement: c7cp01778b1.zip [file c7cp01778b1.zip]

| SpaceGroup / T | T1 | T2   | T3   | T4   | T5 | T6 |      |
|----------------|----|------|------|------|----|----|------|
| 001            | 0  | 2    | 0    | 0    | 0  | 0  | 2    |
| 002            | 0  | 8986 | 0    | 0    | 0  | 0  | 8986 |
| 003            | 1  | 6    | 0    | 0    | 0  | 0  | 7    |
| 004            | 1  | 12   | 0    | 0    | 0  | 0  | 13   |
| 005            | 5  | 136  | 0    | 0    | 0  | 0  | 141  |
| 006            | 1  | 5    | 0    | 0    | 0  | 0  | 6    |
| 007            | 0  | 0    | 0    | 0    | 0  | 0  | 0    |
| 008            | 0  | 0    | 0    | 0    | 0  | 0  | 0    |
| 009            | 2  | 6    | 0    | 0    | 0  | 0  | 8    |
| 010            | 2  | 186  | 0    | 0    | 0  | 0  | 188  |
| 011            | 10 | 236  | 0    | 0    | 0  | 0  | 246  |
| 012            | 13 | 857  | 0    | 0    | 0  | 0  | 870  |
| 013            | 2  | 546  | 0    | 0    | 0  | 0  | 548  |
| 014            | 8  | 369  | 0    | 0    | 0  | 0  | 377  |
| 015            | 26 | 688  | 0    | 0    | 0  | 0  | 714  |
| 016            | 0  | 77   | 0    | 0    | 0  | 0  | 77   |
| 017            | 2  | 94   | 0    | 0    | 0  | 0  | 96   |
| 018            | 0  | 26   | 0    | 0    | 0  | 0  | 26   |
| 019            | 6  | 121  | 0    | 0    | 0  | 0  | 127  |
| 020            | 5  | 158  | 0    | 0    | 0  | 0  | 163  |
| 021            | 6  | 287  | 0    | 0    | 0  | 0  | 293  |
| 022            | 6  | 307  | 0    | 0    | 0  | 0  | 313  |
| 023            | 3  | 52   | 0    | 0    | 0  | 0  | 55   |
| 024            | 2  | 57   | 0    | 0    | 0  | 0  | 59   |
| 025            | 0  | 0    | 0    | 0    | 0  | 0  | 0    |
| 026            | 0  | 3    | 0    | 0    | 0  | 0  | 3    |
| 027            | 0  | 3    | 0    | 0    | 0  | 0  | 3    |
| 028            | 0  | 0    | 0    | 0    | 0  | 0  | 0    |
| 029            | 0  | 3    | 0    | 0    | 0  | 0  | 3    |
| 030            | 2  | 15   | 0    | 0    | 0  | 0  | 17   |
| 031            | 0  | 0    | 0    | 0    | 0  | 0  | 0    |
| 032            | 0  | 0    | 0    | 0    | 0  | 0  | 0    |
| 033            | 1  | 8    | 0    | 0    | 0  | 0  | 9    |
| 034            | 0  | 5    | 0    | 0    | 0  | 0  | 5    |
| 035            | 0  | 0    | 0    | 0    | 0  | 0  | 0    |
| 036            | 0  | 8    | 0    | 0    | 0  | 0  | 8    |
| 037            | 2  | 19   | 0    | 0    | 0  | 0  | 21   |
| 038            | 0  | 3    | 0    | 0    | 0  | 0  | 3    |
| 039            | 0  | 8    | 0    | 0    | 0  | 0  | 8    |
| 040            | 1  | 1    | 0    | 0    | 0  | 0  | 2    |
| 041            | 0  | 8    | 0    | 0    | 0  | 0  | 8    |
| 042            | 0  | 6    | 99   | 1159 | 0  | 0  | 1264 |
| 043            | 4  | 26   | 0    | 0    | 0  | 0  | 30   |
| 044            | 1  | 6    | 0    | 0    | 0  | 0  | 7    |
| 045            | 0  | 1    | 0    | 0    | 0  | 0  | 1    |
| 046            | 4  | 27   | 0    | 0    | 0  | 0  | 31   |
| 047            | 0  | 4    | 0    | 0    | 0  | 0  | 4    |
| 048            | 29 | 428  | 0    | 0    | 0  | 0  | 457  |
| 049            | 0  | 45   | 0    | 0    | 0  | 0  | 45   |
| 050            | 0  | 424  | 0    | 0    | 0  | 0  | 424  |
| 051            | 0  | 35   | 1314 | 2361 | 0  | 0  | 3710 |
| 052            | 7  | 137  | 0    | 0    | 0  | 0  | 144  |
| 053            | 2  | 80   | 4139 | 0    | 0  | 0  | 4221 |
| 054            | 1  | 89   | 0    | 0    | 0  | 0  | 90   |
| 055            | 0  | 19   | 565  | 422  | 0  | 0  | 1006 |
| 056            | 5  | 120  | 0    | 0    | 0  | 0  | 125  |
| 057            | 2  | 60   | 0    | 0    | 0  | 0  | 62   |
| 058            | 1  | 37   | 0    | 0    | 0  | 0  | 38   |

|     |    |      |      |       |   |   |       |
|-----|----|------|------|-------|---|---|-------|
| 059 | 2  | 34   | 265  | 4141  | 0 | 0 | 4442  |
| 060 | 2  | 97   | 0    | 0     | 0 | 0 | 99    |
| 061 | 0  | 20   | 0    | 0     | 0 | 0 | 20    |
| 062 | 9  | 95   | 4238 | 0     | 0 | 0 | 4342  |
| 063 | 2  | 73   | 1186 | 52837 | 0 | 0 | 54098 |
| 064 | 1  | 117  | 0    | 0     | 0 | 0 | 118   |
| 065 | 0  | 57   | 1649 | 32044 | 0 | 0 | 33750 |
| 066 | 5  | 156  | 0    | 0     | 0 | 0 | 161   |
| 067 | 0  | 97   | 0    | 0     | 0 | 0 | 97    |
| 068 | 4  | 819  | 0    | 0     | 0 | 0 | 823   |
| 069 | 0  | 98   | 0    | 0     | 0 | 0 | 98    |
| 070 | 42 | 2816 | 0    | 0     | 0 | 0 | 2858  |
| 071 | 3  | 49   | 0    | 0     | 0 | 0 | 52    |
| 072 | 1  | 125  | 0    | 0     | 0 | 0 | 126   |
| 073 | 2  | 163  | 0    | 0     | 0 | 0 | 165   |
| 074 | 8  | 211  | 8500 | 0     | 0 | 0 | 8719  |
| 075 | 0  | 0    | 0    | 0     | 0 | 0 | 0     |
| 076 | 2  | 7    | 0    | 0     | 0 | 0 | 9     |
| 077 | 0  | 2    | 0    | 0     | 0 | 0 | 2     |
| 078 | 2  | 7    | 0    | 0     | 0 | 0 | 9     |
| 079 | 1  | 4    | 0    | 0     | 0 | 0 | 5     |
| 080 | 5  | 17   | 0    | 0     | 0 | 0 | 22    |
| 081 | 0  | 27   | 0    | 0     | 0 | 0 | 27    |
| 082 | 4  | 49   | 0    | 0     | 0 | 0 | 53    |
| 083 | 0  | 12   | 0    | 0     | 0 | 0 | 12    |
| 084 | 2  | 24   | 0    | 0     | 0 | 0 | 26    |
| 085 | 2  | 19   | 0    | 0     | 0 | 0 | 21    |
| 086 | 6  | 59   | 0    | 0     | 0 | 0 | 65    |
| 087 | 3  | 34   | 1083 | 0     | 0 | 0 | 1120  |
| 088 | 22 | 348  | 0    | 0     | 0 | 0 | 370   |
| 089 | 0  | 67   | 0    | 0     | 0 | 0 | 67    |
| 090 | 1  | 20   | 0    | 0     | 0 | 0 | 21    |
| 091 | 22 | 695  | 0    | 0     | 0 | 0 | 717   |
| 092 | 1  | 20   | 0    | 0     | 0 | 0 | 21    |
| 093 | 2  | 180  | 0    | 0     | 0 | 0 | 182   |
| 094 | 0  | 49   | 0    | 0     | 0 | 0 | 49    |
| 095 | 15 | 705  | 0    | 0     | 0 | 0 | 720   |
| 096 | 2  | 28   | 0    | 0     | 0 | 0 | 30    |
| 097 | 5  | 77   | 0    | 0     | 0 | 0 | 82    |
| 098 | 9  | 184  | 0    | 0     | 0 | 0 | 193   |
| 099 | 0  | 0    | 0    | 0     | 0 | 0 | 0     |
| 100 | 0  | 0    | 0    | 0     | 0 | 0 | 0     |
| 101 | 1  | 4    | 0    | 0     | 0 | 0 | 5     |
| 102 | 0  | 1    | 0    | 0     | 0 | 0 | 1     |
| 103 | 0  | 1    | 0    | 0     | 0 | 0 | 1     |
| 104 | 1  | 3    | 0    | 0     | 0 | 0 | 4     |
| 105 | 1  | 3    | 0    | 0     | 0 | 0 | 4     |
| 106 | 0  | 4    | 0    | 0     | 0 | 0 | 4     |
| 107 | 3  | 7    | 0    | 0     | 0 | 0 | 10    |
| 108 | 0  | 5    | 0    | 0     | 0 | 0 | 5     |
| 109 | 1  | 8    | 0    | 0     | 0 | 0 | 9     |
| 110 | 0  | 13   | 0    | 0     | 0 | 0 | 13    |
| 111 | 3  | 89   | 0    | 0     | 0 | 0 | 92    |
| 112 | 3  | 50   | 0    | 0     | 0 | 0 | 53    |
| 113 | 0  | 37   | 0    | 0     | 0 | 0 | 37    |
| 114 | 1  | 33   | 0    | 0     | 0 | 0 | 34    |
| 115 | 1  | 23   | 0    | 0     | 0 | 0 | 24    |
| 116 | 3  | 102  | 0    | 0     | 0 | 0 | 105   |
| 117 | 0  | 36   | 0    | 0     | 0 | 0 | 36    |

|     |    |      |      |       |        |   |        |
|-----|----|------|------|-------|--------|---|--------|
| 118 | 3  | 94   | 0    | 0     | 0      | 0 | 97     |
| 119 | 2  | 30   | 522  | 8467  | 0      | 0 | 9021   |
| 120 | 1  | 39   | 0    | 0     | 0      | 0 | 40     |
| 121 | 7  | 106  | 0    | 0     | 0      | 0 | 113    |
| 122 | 7  | 118  | 0    | 0     | 0      | 0 | 125    |
| 123 | 0  | 25   | 350  | 4156  | 0      | 0 | 4531   |
| 124 | 1  | 60   | 0    | 0     | 0      | 0 | 61     |
| 125 | 2  | 88   | 0    | 0     | 0      | 0 | 90     |
| 126 | 4  | 72   | 0    | 0     | 0      | 0 | 76     |
| 127 | 0  | 20   | 0    | 0     | 0      | 0 | 20     |
| 128 | 2  | 35   | 0    | 0     | 0      | 0 | 37     |
| 129 | 6  | 21   | 0    | 0     | 0      | 0 | 27     |
| 130 | 4  | 30   | 0    | 0     | 0      | 0 | 34     |
| 131 | 3  | 54   | 918  | 13133 | 170986 | 0 | 185094 |
| 132 | 3  | 65   | 0    | 0     | 0      | 0 | 68     |
| 133 | 2  | 130  | 0    | 0     | 0      | 0 | 132    |
| 134 | 8  | 100  | 0    | 0     | 0      | 0 | 108    |
| 135 | 1  | 40   | 0    | 0     | 0      | 0 | 41     |
| 136 | 3  | 77   | 0    | 0     | 0      | 0 | 80     |
| 137 | 6  | 31   | 0    | 0     | 0      | 0 | 37     |
| 138 | 5  | 138  | 0    | 0     | 0      | 0 | 143    |
| 139 | 6  | 43   | 896  | 13507 | 142205 | 0 | 156657 |
| 140 | 3  | 96   | 0    | 0     | 0      | 0 | 99     |
| 141 | 6  | 79   | 1587 | 19787 | 0      | 0 | 21459  |
| 142 | 6  | 231  | 0    | 0     | 0      | 0 | 237    |
| 143 | 0  | 0    | 0    | 0     | 0      | 0 | 0      |
| 144 | 6  | 28   | 0    | 0     | 0      | 0 | 34     |
| 145 | 6  | 41   | 0    | 0     | 0      | 0 | 47     |
| 146 | 10 | 156  | 0    | 0     | 0      | 0 | 166    |
| 147 | 2  | 18   | 0    | 0     | 0      | 0 | 20     |
| 148 | 10 | 45   | 0    | 0     | 0      | 0 | 55     |
| 149 | 0  | 65   | 0    | 0     | 0      | 0 | 65     |
| 150 | 2  | 38   | 0    | 0     | 0      | 0 | 40     |
| 151 | 17 | 1045 | 0    | 0     | 0      | 0 | 1062   |
| 152 | 12 | 234  | 0    | 0     | 0      | 0 | 246    |
| 153 | 6  | 74   | 0    | 0     | 0      | 0 | 80     |
| 154 | 7  | 59   | 0    | 0     | 0      | 0 | 66     |
| 155 | 31 | 191  | 0    | 0     | 0      | 0 | 222    |
| 156 | 0  | 0    | 0    | 0     | 0      | 0 | 0      |
| 157 | 0  | 0    | 0    | 0     | 0      | 0 | 0      |
| 158 | 0  | 0    | 75   | 0     | 0      | 0 | 75     |
| 159 | 2  | 4    | 0    | 0     | 0      | 0 | 6      |
| 160 | 7  | 52   | 0    | 0     | 0      | 0 | 59     |
| 161 | 1  | 85   | 0    | 0     | 0      | 0 | 86     |
| 162 | 2  | 103  | 0    | 0     | 0      | 0 | 105    |
| 163 | 6  | 177  | 0    | 0     | 0      | 0 | 183    |
| 164 | 2  | 33   | 1219 | 0     | 0      | 0 | 1254   |
| 165 | 3  | 54   | 0    | 0     | 0      | 0 | 57     |
| 166 | 26 | 438  | 1992 | 31706 | 0      | 0 | 34162  |
| 167 | 29 | 53   | 0    | 0     | 0      | 0 | 82     |
| 168 | 0  | 0    | 0    | 0     | 0      | 0 | 0      |
| 169 | 4  | 27   | 0    | 0     | 0      | 0 | 31     |
| 170 | 3  | 6    | 0    | 0     | 0      | 0 | 9      |
| 171 | 2  | 50   | 0    | 0     | 0      | 0 | 52     |
| 172 | 2  | 44   | 0    | 0     | 0      | 0 | 46     |
| 173 | 2  | 4    | 0    | 0     | 0      | 0 | 6      |
| 174 | 0  | 33   | 0    | 0     | 0      | 0 | 33     |
| 175 | 0  | 27   | 0    | 0     | 0      | 0 | 27     |
| 176 | 7  | 56   | 1698 | 0     | 0      | 0 | 1761   |

|     |    |     |      |       |        |       |        |
|-----|----|-----|------|-------|--------|-------|--------|
| 177 | 0  | 206 | 0    | 0     | 0      | 0     | 206    |
| 178 | 19 | 451 | 0    | 0     | 0      | 0     | 470    |
| 179 | 22 | 469 | 0    | 0     | 0      | 0     | 491    |
| 180 | 4  | 271 | 0    | 0     | 0      | 0     | 275    |
| 181 | 7  | 374 | 0    | 0     | 0      | 0     | 381    |
| 182 | 9  | 158 | 0    | 0     | 0      | 0     | 167    |
| 183 | 0  | 0   | 0    | 0     | 0      | 0     | 0      |
| 184 | 0  | 2   | 0    | 0     | 0      | 0     | 2      |
| 185 | 0  | 14  | 0    | 0     | 0      | 0     | 14     |
| 186 | 2  | 4   | 47   | 0     | 0      | 0     | 53     |
| 187 | 0  | 31  | 0    | 0     | 0      | 0     | 31     |
| 188 | 2  | 114 | 0    | 0     | 0      | 0     | 116    |
| 189 | 0  | 26  | 446  | 5652  | 71323  | 0     | 77447  |
| 190 | 5  | 87  | 0    | 0     | 0      | 0     | 92     |
| 191 | 0  | 71  | 1188 | 8401  | 2197   | 56493 | 68350  |
| 192 | 4  | 178 | 0    | 0     | 0      | 0     | 182    |
| 193 | 4  | 131 | 0    | 0     | 0      | 0     | 135    |
| 194 | 7  | 42  | 891  | 12407 | 159764 | 0     | 173111 |
| 195 | 4  | 16  | 0    | 0     | 0      | 0     | 20     |
| 196 | 0  | 7   | 0    | 0     | 0      | 0     | 7      |
| 197 | 1  | 14  | 0    | 0     | 0      | 0     | 15     |
| 198 | 4  | 3   | 0    | 0     | 0      | 0     | 7      |
| 199 | 9  | 33  | 0    | 0     | 0      | 0     | 42     |
| 200 | 0  | 35  | 0    | 0     | 0      | 0     | 35     |
| 201 | 6  | 2   | 0    | 0     | 0      | 0     | 8      |
| 202 | 3  | 24  | 0    | 0     | 0      | 0     | 27     |
| 203 | 8  | 2   | 0    | 0     | 0      | 0     | 10     |
| 204 | 3  | 16  | 0    | 0     | 0      | 0     | 19     |
| 205 | 6  | 31  | 0    | 0     | 0      | 0     | 37     |
| 206 | 4  | 34  | 0    | 0     | 0      | 0     | 38     |
| 207 | 3  | 0   | 0    | 0     | 0      | 0     | 3      |
| 208 | 1  | 4   | 0    | 0     | 0      | 0     | 5      |
| 209 | 2  | 0   | 0    | 0     | 0      | 0     | 2      |
| 210 | 8  | 1   | 0    | 0     | 0      | 0     | 9      |
| 211 | 8  | 24  | 0    | 0     | 0      | 0     | 32     |
| 212 | 7  | 0   | 0    | 0     | 0      | 0     | 7      |
| 213 | 6  | 34  | 0    | 0     | 0      | 0     | 40     |
| 214 | 12 | 0   | 0    | 0     | 0      | 0     | 12     |
| 215 | 3  | 24  | 0    | 0     | 0      | 0     | 27     |
| 216 | 1  | 5   | 0    | 0     | 0      | 0     | 6      |
| 217 | 3  | 21  | 1    | 0     | 0      | 0     | 25     |
| 218 | 2  | 26  | 0    | 0     | 0      | 0     | 28     |
| 219 | 1  | 0   | 0    | 0     | 0      | 0     | 1      |
| 220 | 4  | 34  | 0    | 0     | 0      | 0     | 38     |
| 221 | 3  | 13  | 0    | 0     | 0      | 0     | 16     |
| 222 | 10 | 0   | 0    | 0     | 0      | 0     | 10     |
| 223 | 4  | 59  | 1119 | 0     | 0      | 0     | 1182   |
| 224 | 5  | 80  | 0    | 0     | 0      | 0     | 85     |
| 225 | 6  | 25  | 27   | 21    | 132    | 150   | 361    |
| 226 | 3  | 30  | 0    | 0     | 0      | 0     | 33     |
| 227 | 8  | 11  | 140  | 1044  | 0      | 0     | 1203   |
| 228 | 4  | 0   | 0    | 0     | 0      | 0     | 4      |
| 229 | 7  | 57  | 513  | 3767  | 46480  | 0     | 50824  |
| 230 | 5  | 11  | 0    | 0     | 0      | 0     | 16     |

|     |       |       |        |        |       |        |
|-----|-------|-------|--------|--------|-------|--------|
| 915 | 31289 | 36667 | 215012 | 593087 | 56643 | 933613 |
|-----|-------|-------|--------|--------|-------|--------|
