# Supplementary material for: Selecting strong Brønsted acid zeolites through screening from a database of hypothetical frameworks
Source: Royal Society of Chemistry journal article supplement (doi:10.1039/c7cp01778b), 2017-01-01
Supplement: c7cp01778b1.zip [file c7cp01778b1.zip]

| FTC  | T-O-T | b    | omega | T1<br>label | O<br>label | T2<br>label | ring-size{ring-number}:Ring Count<br>(unit cell) | average<br>ring size | ring index (this T-site) | BGB energy<br>w.r.t. quartz<br>(eV/TO2) | BS<br>energy<br>w.r.t.<br>quartz<br>(eV/TO2) | Eads<br>(kJ/mol) |
|------|-------|------|-------|-------------|------------|-------------|--------------------------------------------------|----------------------|--------------------------|-----------------------------------------|----------------------------------------------|------------------|
| JBW  | 153.2 | 4.18 | 26.4  | T1          | O1         | T1          | 4{1}_6{5}_8{1}                                   | 6                    | 4{1}_6{3}                | 0.07                                    | 0.025                                        | 116.8            |
| ATN  | 150.1 | 4.14 | 29.8  | T1          | O2         | T1          | 4{4}_6{8}_8{2}                                   | 5.71                 | 6{2}_8{1}                | 0.08                                    | 0.035                                        | 116.6            |
| ATT  | 145.3 | 4.1  | 34.7  | T1          | O4         | T1          | 4{8}_6{2}_8{6}                                   | 5.75                 | 4{1}_6{1}_8{2}           |                                         | 0.045                                        | 115.2            |
| AFR  | 141.5 | 4.05 | 38.6  | T3          | O9         | T4          | 4{22}_6{24}_8{4}_12{2}                           | 5.54                 | 4{2}_6{3}                | 0.126                                   | 0.051                                        | 115.2            |
| AFO  | 140.2 | 4.03 | 40.3  | T3          | O7         | T3          | 4{8}_6{84}                                       | 5.83                 | 6{8}                     |                                         | 0.051                                        | 115.1            |
| BEA  | 138.5 | 4.01 | 41.9  | T1          | O1         | T3          | 4{20}_5{48}_6{8}_12{32}                          | 6.96                 | 4{1}_5{1}_12{3}          |                                         | 0.053                                        | 115.1            |
| VFI  | 125.6 | 3.81 | 55.4  | T1          | O3         | T2          | 4{12}_6{82}                                      | 5.74                 | 4{1}_6{6}                | 0.117                                   | 0.054                                        | 117.2            |
| MEI  | 131.2 | 3.9  | 49.8  | T3          | O6         | T3          | 3{2}_4{18}_5{12}_7{6}_12{2}                      | 5.1                  | 3{1}_5{2}                | 0.129                                   | 0.055                                        | 115.9            |
| SOS  | 116.1 | 3.5  | 73.9  | T3          | O6         | T3          | 3{8}_4{8}_6{8}_8{26}_12{2}                       | 6.46                 | 3{2}                     | 0.105                                   | 0.059                                        | 122.4            |
| -CLO | 142.2 | 4.06 | 38    | T1          | O3         | T2          | 4{144}_6{56}_8{9}_12{8}                          | 4.98                 | 4{2}_6{1}                |                                         | 0.059                                        | 115.1            |
| EMT  | 141.4 | 4.05 | 38.7  | T1          | O2         | T4          | 4{72}_6{32}_12{8}                                | 5.14                 | 4{1}_6{1}_12{1}          | 0.156                                   | 0.059                                        | 115.1            |
| RWR  | 135.4 | 3.96 | 47.2  | T2          | O2         | T2          | 4{4}_5{16}_6{24}_8{8}                            | 5.85                 | 4{1}_6{2}_8{1}           |                                         | 0.060                                        | 114.0            |
| -RON | 138.9 | 2.52 | 78.5  | T4          | O1         | T1          | 4{12}_6{20}_8{16}_10{4}                          | 6.46                 | 6{3}_8{2}                | 0.113                                   | 0.061                                        | 184.2            |
| DFT  | 145.1 | 4.09 | 34.9  | T1          | O1         | T1          | 4{4}_6{8}_8{10}                                  | 6.55                 | 4{1}_6{4}_8{5}           | 0.099                                   | 0.064                                        | 115.7            |
| SAS  | 148.1 | 4.18 | 31.7  | T2          | O5         | T2          | 4{20}_6{16}_8{2}                                 | 5.05                 | 4{2}_6{1}                |                                         | 0.064                                        | 112.3            |
| GOO  | 124.7 | 3.8  | 57.8  | T1          | O2         | T3          | 4{20}_6{16}_8{32}_10{24}                         | 7.3                  | 4{2}_6{2}_8{1}_10{3}     |                                         | 0.065                                        | 115.8            |
| JST  | 128   | 3.84 | 54.8  | T1          | O1         | T1          | 3{32}_6{4}_10{24}                                | 6                    | 3{1}_6{1}_10{1}          |                                         | 0.066                                        | 115.7            |
| MTN  | 177   | 4.26 | 2     | T1          | O1         | T2          | 5{144}_6{16}                                     | 5.1                  | 5{3}                     | 0.111                                   | 0.066                                        | 131.9            |
| SSF  | 144.2 | 4.09 | 35.9  | T1          | O4         | T1          | 4{18}_5{12}_6{49}_12{12}                         | 6.26                 | 4{1}_6{2}_12{2}          |                                         | 0.067                                        | 114.8            |
| ITW  | 144   | 4.08 | 36.3  | T2          | O6         | T3          | 4{12}_5{8}_6{4}_8{8}                             | 5.5                  | 4{2}_6{1}                | 0.124                                   | 0.068                                        | 115.1            |
| OFF  | 143.1 | 4.07 | 37.1  | T1          | O2         | T1          | 4{12}_6{6}_8{3}                                  | 5.14                 | 4{1}_6{2}                |                                         | 0.070                                        | 115.1            |
| IRR  | 130.2 | 3.84 | 52.7  | T3          | O8         | T3          | 3{4}_4{24}_5{24}_6{18}_12{6}                     | 5.37                 | 3{1}_4{1}_5{1}           | 0.043                                   | 0.070                                        | 117.5            |
| VSV  | 131   | 3.9  | 50    | T1          | O1         | T3          | 3{8}_4{8}_5{16}_8{16}_9{32}                      | 6.9                  | 3{1}_9{8}                | 0.141                                   | 0.070                                        | 115.7            |
| OSO  | 128.2 | 3.87 | 52.9  | T1          | O2         | T2          | 3{6}_8{3}_14{15}                                 | 10.5                 | 3{1}_8{1}_14{15}         | 0.142                                   | 0.072                                        | 115.3            |
| ATS  | 142.5 | 4.06 | 37.7  | T3          | O6         | T3          | 4{6}_6{16}_12{2}                                 | 6                    | 6{3}_12{1}               | 0.141                                   | 0.072                                        | 115.3            |
| MON  | 147.7 | 4.12 | 32.1  | T1          | O2         | T1          | 4{4}_5{16}_8{12}                                 | 6                    | 4{1}_5{2}_8{3}           |                                         | 0.073                                        | 116.0            |
| GME  | 147.3 | 4.12 | 32.5  | T1          | O1         | T1          | 4{18}_6{4}_8{6}                                  | 5.14                 | 4{2}_6{1}                | 0.142                                   | 0.074                                        | 115.7            |
| AFN  | 135.5 | 3.99 | 47.7  | T2          | O1         | T4          | 4{22}_6{12}_8{32}                                | 6.3                  | 4{1}_6{2}_8{2}           | 0.06                                    | 0.074                                        | 111.6            |
| RHO  | 147.1 | 4.12 | 32.9  | T1          | O1         | T1          | 4{36}_6{8}_8{12}                                 | 5.14                 | 4{1}_6{1}_8{1}           |                                         | 0.074                                        | 115.3            |
| IWV  | 135.4 | 3.97 | 47    | T1          | O1         | T2          | 4{32}_5{128}_6{48}_12{8}_14{40}                  | 6.69                 | 5{2}_12{1}_14{5}         |                                         | 0.074                                        | 113.5            |
| AET  | 126.6 | 3.83 | 54.4  | T1          | O2         | T5          | 4{16}_6{156}                                     | 5.81                 | 4{1}_6{6}                | 0.123                                   | 0.075                                        | 116.7            |
| SFF  | 132.4 | 3.92 | 49.4  | T5          | O14        | T5          | 4{6}_5{24}_6{10}_10{2}                           | 5.33                 | 4{1}_6{1}_10{1}          |                                         | 0.075                                        | 114.9            |
| -WEN | 149.7 | 2.82 | 90    | T3          | O6         | T2          | 4{12}_6{5}_8{6}_10{6}                            | 6.41                 | 8{4}_10{4}               | 0.143                                   | 0.075                                        | 154.5            |
| TSC  | 142.4 | 4.06 | 37.8  | T1          | O2         | T1          | 4{288}_6{96}_8{72}                               | 5.05                 | 4{2}_6{1}                |                                         | 0.075                                        | 115.2            |
| FRA  | 156.5 | 4.11 | 30    | T3          | O13        | T3          | 4{30}_6{40}                                      | 5.14                 | 4{2}_6{1}                | 0.141                                   | 0.076                                        | 118.4            |
| RUT  | 137.8 | 4    | 42.6  | T2          | O7         | T3          | 4{12}_5{16}_6{12}_8{2}                           | 5.14                 | 4{1}_5{1}_6{1}           |                                         | 0.078                                        | 115.2            |
| UEI  | 142.1 | 4.09 | 37.2  | T2          | O5         | T2          | 4{28}_6{16}_8{44}                                | 6.36                 | 4{1}_6{1}_8{6}           |                                         | 0.081                                        | 113.7            |
| AFI  | 148.5 | 4.13 | 31.3  | T1          | O3         | T1          | 4{6}_6{52}                                       | 5.79                 | 6{5}                     |                                         | 0.084                                        | 116.0            |
| SAT  | 142   | 4.06 | 38.3  | T2          | O7         | T2          | 4{45}_6{30}_8{9}                                 | 5.14                 | 4{2}_6{1}                |                                         | 0.084                                        | 114.8            |

| FTC  | T-O-T | b    | omega | T1<br>label | O<br>label | T2<br>label | ring-size{ring-number}:Ring Count<br>(unit cell) | average<br>ring size | ring index (this T-site) | BGB energy<br>w.r.t. quartz<br>(eV/TO2) | BS<br>energy<br>w.r.t.<br>quartz<br>(eV/TO2) | Eads<br>(kJ/mol) |
|------|-------|------|-------|-------------|------------|-------------|--------------------------------------------------|----------------------|--------------------------|-----------------------------------------|----------------------------------------------|------------------|
| MFS  | 144.3 | 4.09 | 36.2  | T2          | O5         | T6          | 4{4}_5{32}_6{4}_8{8}_10{4}                       | 5.85                 | 4{1}_5{1}_10{1}          |                                         | 0.084                                        | 114.6            |
| GIS  | 149.8 | 4.14 | 30    | T1          | O2         | T1          | 4{12}_8{8}                                       | 5.6                  | 4{1}_8{3}                |                                         | 0.084                                        | 116.4            |
| CGF  | 129.6 | 3.88 | 51.6  | T3          | O2         | T5          | 4{20}_6{40}_8{6}_10{4}                           | 5.83                 | 4{1}_6{3}_10{1}          |                                         | 0.086                                        | 115.7            |
| LTJ  | 137   | 3.95 | 41.8  | T1          | O2         | T1          | 4{8}_6{12}_8{24}                                 | 6.73                 | 4{2}_6{1}_8{4}           | 0.141                                   | 0.086                                        | 119.2            |
| MTT  | 143.4 | 4.07 | 36.8  | T3          | O6         | T7          | 5{8}_6{18}_10{2}                                 | 6                    | 5{1}_10{1}               |                                         | 0.086                                        | 115.4            |
| NON  | 144.4 | 4.1  | 35.6  | T4          | O9         | T5          | 4{4}_5{64}_6{40}_12{8}                           | 5.79                 | 5{2}_6{2}_12{2}          | 0.035                                   | 0.087                                        | 114.4            |
| ATO  | 142.5 | 4.07 | 37.7  | T1          | O3         | T1          | 4{9}_6{42}                                       | 5.65                 | 4{1}_6{2}                |                                         | 0.087                                        | 114.6            |
| ABW  | 149.4 | 4.15 | 30.2  | T1          | O1         | T1          | 4{2}_6{4}_8{2}                                   | 6                    | 4{1}_8{1}                |                                         | 0.087                                        | 115.6            |
| SIV  | 145.8 | 4.1  | 34    | T2          | O6         | T2          | 4{48}_8{32}                                      | 5.6                  | 4{1}_8{3}                |                                         | 0.089                                        | 115.7            |
| IWW  | 136.4 | 3.99 | 45.2  | T6          | O16        | T7          | 4{40}_5{56}_6{40}_8{16}_10{16}                   | 6.76                 | 4{1}_6{4}                | 0.132                                   | 0.089                                        | 113.7            |
| RSN  | 131   | 3.9  | 50    | T1          | O1         | T5          | 3{8}_4{10}_5{8}_6{8}_8{20}                       | 6.98                 | 3{1}_9{8}                |                                         | 0.091                                        | 115.7            |
| ZON  | 131.9 | 3.92 | 49    | T2          | O5         | T3          | 4{20}_6{24}_8{8}                                 | 5.54                 | 4{1}_6{1}_8{1}           | 0.127                                   | 0.091                                        | 115.2            |
| AEL  | 137.5 | 4    | 42.9  | T1          | O1         | T2          | 4{8}_6{84}                                       | 5.83                 | 4{1}_6{7}                |                                         | 0.091                                        | 115.0            |
| SBN  | 132.4 | 3.91 | 50.6  | T1          | O2         | T1          | 3{2}_4{6}_8{6}                                   | 5.57                 | 3{1}_8{2}                | 0.134                                   | 0.092                                        | 114.5            |
| FAR  | 139.5 | 4.04 | 41.5  | T3          | O8         | T3          | 4{42}_6{56}                                      | 5.14                 | 4{2}_6{1}                |                                         | 0.092                                        | 113.5            |
| SFS  | 140.2 | 4.03 | 39.7  | T2          | O7         | T5          | 4{10}_5{44}_6{18}_10{8}_12{6}                    | 6.05                 | 5{1}_6{3}_12{1}          |                                         | 0.092                                        | 115.6            |
| DOH  | 157.4 | 4.23 | 22    | T2          | O4         | T2          | 4{3}_5{30}_6{7}                                  | 5.1                  | 4{1}_6{2}                | 0.155                                   | 0.092                                        | 117.1            |
| JSW  | 132.9 | 3.92 | 48.6  | T1          | O4         | T6          | 4{24}_6{40}_8{32}                                | 6.17                 | 4{2}_6{1}_8{3}           |                                         | 0.093                                        | 115.5            |
| MAR  | 131.8 | 3.9  | 50.2  | T2          | O7         | T3          | 4{36}_6{48}                                      | 5.14                 | 4{1}_6{2}                |                                         | 0.093                                        | 115.5            |
| DON  | 134.1 | 3.95 | 46.6  | T1          | O2         | T4          | 4{16}_5{16}_6{68}                                | 5.52                 | 5{1}_6{3}                |                                         | 0.094                                        | 115.2            |
| SAO  | 134.4 | 3.94 | 44.8  | T1          | O1         | T3          | 4{40}_6{48}_12{34}                               | 7.02                 | 4{2}_6{1}_12{6}          | 0.133                                   | 0.095                                        | 117.4            |
| SFG  | 142.6 | 4.05 | 37.9  | T3          | O11        | T4          | 4{18}_5{26}_6{60}_7{8}_10{8}                     | 5.82                 | 6{4}_10{1}               |                                         | 0.095                                        | 115.8            |
| NPT  | 131.7 | 3.91 | 51    | T1          | O3         | T2          | 3{20}_4{3}_8{18}                                 | 5.27                 | 3{1}_8{2}                | 0.129                                   | 0.096                                        | 114.2            |
| YUG  | 144.5 | 4.09 | 35.6  | T1          | O3         | T2          | 4{6}_5{8}_8{8}                                   | 5.82                 | 4{1}_5{1}_8{2}           |                                         | 0.096                                        | 115.1            |
| NPO  | 132.3 | 3.9  | 50.5  | T1          | O1         | T1          | 3{2}_6{6}                                        | 5.25                 | 3{1}_6{2}                |                                         | 0.097                                        | 115.3            |
| OBW  | 131.9 | 3.9  | 51    | T3          | O3         | T4          | 3{48}_4{2}_8{28}_10{8}                           | 5.3                  | 3{1}_8{2}                |                                         | 0.098                                        | 114.9            |
| CZP  | 120.8 | 3.73 | 61.5  | T1          | O1         | T3          | 4{18}_8{36}                                      | 6.67                 | 4{2}_8{3}                | 0.109                                   | 0.098                                        | 117.4            |
| IMF  | 142.8 | 4.06 | 37.4  | T1          | O16        | T4          | 4{24}_5{256}_6{84}_10{72}_12{8}                  | 6.07                 | 5{2}_10{4}               | 0.146                                   | 0.099                                        | 115.6            |
| CHA  | 147.8 | 4.13 | 32.1  | T1          | O1         | T1          | 4{27}_6{6}_8{9}                                  | 5.14                 | 4{2}_6{1}                |                                         | 0.099                                        | 115.3            |
| AFT  | 146.5 | 4.11 | 33.4  | Si3         | O9         | Si3         | 4{54}_6{12}_8{18}                                | 5.14                 | 4{2}_6{1}                |                                         | 0.101                                        | 115.6            |
| ESV  | 139.1 | 4.02 | 41.5  | T4          | O10        | T4          | 4{20}_5{16}_6{16}_8{4}                           | 5.14                 | 4{1}_6{2}                | 0.164                                   | 0.101                                        | 114.8            |
| AFX  | 147.2 | 4.12 | 32.5  | T2          | O5         | T2          | 4{36}_6{8}_8{12}                                 | 5.14                 | 4{2}_6{1}                | 0.083                                   | 0.102                                        | 115.7            |
| -ITV | 148.1 | 2.81 | 74.3  | T6          | O15        | T7          | 4{120}_6{132}                                    | 5.05                 | 4{2}                     |                                         | 0.102                                        | 168.3            |
| STW  | 133.1 | 3.92 | 48.2  | T1          | O2         | T2          | 4{36}_5{24}_8{6}_10{6}                           | 5.17                 | 5{1}_8{1}_10{1}          | 0.111                                   | 0.102                                        | 115.9            |
| BEC  | 138.4 | 4.01 | 42.5  | T1          | O3         | T1          | 4{14}_5{16}_6{8}_12{22}                          | 7.47                 | 4{2}_12{6}               |                                         | 0.102                                        | 114.6            |
| OKO  | 139.1 | 3.99 | 39.9  | Si3         | O10        | Si5         | 4{2}_5{72}_6{12}_10{4}_12{20}                    | 6.55                 | 5{4}_12{3}               | 0.165                                   | 0.102                                        | 118.2            |
| STI  | 141.1 | 4.05 | 39.3  | T2          | O5         | T3          | 4{32}_5{32}_6{32}_8{20}_10{8}                    | 5.81                 | 5{2}_8{1}                |                                         | 0.102                                        | 114.6            |
| JRY  | 139.2 | 4    | 42.3  | T1          | O1         | T1          | 4{8}_6{44}_10{28}                                | 7.2                  | 4{2}_6{6}                |                                         | 0.104                                        | 115.5            |
| JSN  | 134.9 | 3.96 | 46.7  | T2          | O5         | T3          | 4{10}_6{12}_8{4}                                 | 5.54                 | 4{1}_6{1}_8{1}           | 0.159                                   | 0.105                                        | 114.5            |

| FTC  | T-O-T | b    | omega | T1<br>label | O<br>label | T2<br>label | ring-size{ring-number}:Ring Count<br>(unit cell) | average<br>ring size | ring index (this T-site) | BGB energy<br>w.r.t. quartz<br>(eV/TO2) | BS<br>energy<br>w.r.t.<br>quartz<br>(eV/TO2) | Eads<br>(kJ/mol) |
|------|-------|------|-------|-------------|------------|-------------|--------------------------------------------------|----------------------|--------------------------|-----------------------------------------|----------------------------------------------|------------------|
| PON  | 134.3 | 3.94 | 47.4  | T1          | O3         | T11         | 4{12}_6{28}_8{4}_10{20}                          | 7                    | 4{1}_6{3}_10{7}          | 0.137                                   | 0.105                                        | 115.2            |
| SOF  | 139   | 4.03 | 41.5  | T4          | O8         | T5          | 4{24}_5{16}_9{8}                                 | 5.17                 | 5{2}_9{1}                |                                         | 0.106                                        | 114.1            |
| AHT  | 125.5 | 3.81 | 55.5  | T1          | O1         | T2          | 4{8}_6{52}                                       | 5.73                 | 4{1}_6{6}                |                                         | 0.106                                        | 117.1            |
| EZT  | 134.3 | 3.97 | 47.2  | T1          | O1         | T5          | 4{28}_6{36}_8{4}_12{72}                          | 8.74                 | 4{1}_6{2}_8{1}_12{6}     |                                         | 0.106                                        | 113.4            |
| MFI  | 132   | 3.92 | 48.7  | T1          | O2         | T2          | 4{4}_5{88}_6{36}_10{28}                          | 6.1                  | 5{3}_10{3}               |                                         | 0.107                                        | 115.5            |
| IFR  | 137.5 | 4    | 42.9  | T1          | O5         | T3          | 4{14}_5{8}_6{20}_12{10}                          | 6.46                 | 6{4}_12{2}               | 0.162                                   | 0.107                                        | 115.0            |
| PUN  | 127.2 | 3.8  | 56    | T1          | O1         | T2          | 3{8}_4{20}_8{4}_10{12}                           | 5.82                 | 3{1}_4{1}_8{1}           | 0.159                                   | 0.108                                        | 117.4            |
| KFI  | 147.7 | 4.13 | 32.1  | T1          | O2         | T1          | 4{72}_6{16}_8{24}                                | 5.14                 | 4{2}_6{1}                | 0.165                                   | 0.108                                        | 115.3            |
| MER  | 145.3 | 4.1  | 34.7  | T1          | O4         | T1          | 4{24}_8{16}                                      | 5.6                  | 4{1}_8{3}                |                                         | 0.108                                        | 115.2            |
| VET  | 133   | 3.95 | 48.4  | T3          | O7         | T4          | 5{8}_6{10}_7{4}_8{2}_12{1}                       | 6.24                 | 5{1}_6{3}_12{1}          |                                         | 0.109                                        | 113.7            |
| SFE  | 136.9 | 3.98 | 44.1  | T3          | O6         | T5          | 4{1}_5{4}_6{9}_12{1}                             | 6                    | 5{1}_6{2}_12{1}          |                                         | 0.109                                        | 115.3            |
| MEP  | 146.2 | 4.12 | 33.7  | T1          | O1         | T1          | 5{48}_6{6}                                       | 5.11                 | 5{2}_6{1}                |                                         | 0.109                                        | 114.7            |
| LOV  | 131.9 | 3.9  | 49.5  | T2          | O4         | T2          | 3{4}_4{6}_6{8}_8{12}_9{16}                       | 7.04                 | 3{1}_8{6}                |                                         | 0.110                                        | 116.1            |
| FER  | 150.1 | 4.15 | 29.9  | T1          | O1         | T3          | 5{40}_6{2}_8{4}_10{8}_12{4}                      | 6.41                 | 5{3}_10{2}               | 0.169                                   | 0.110                                        | 115.8            |
| BOZ  | 131.6 | 3.9  | 50.3  | T2          | O8         | T3          | 3{56}_4{4}_6{4}_8{28}_10{12}                     | 5.31                 | 3{1}_8{2}                | 0.058                                   | 0.111                                        | 115.4            |
| LTN  | 137.7 | 4    | 42.6  | T2          | O7         | T3          | 4{432}_6{416}_8{48}                              | 5.14                 | 4{1}_6{2}                | 0.168                                   | 0.111                                        | 115.2            |
| MTW  | 131.6 | 3.9  | 49.3  | T3          | O5         | T7          | 4{2}_5{8}_6{22}_12{2}                            | 6                    | 5{1}_6{2}_12{1}          | 0.168                                   | 0.112                                        | 116.3            |
| EUO  | 143.2 | 4.03 | 34.5  | T9          | O20        | T9          | 4{8}_5{96}_6{44}_10{4}_12{24}                    | 6.27                 | 4{1}_5{2}                | 0.169                                   | 0.113                                        | 120.0            |
| AFS  | 139   | 4.02 | 41.3  | T1          | O2         | T2          | 4{42}_6{20}_8{24}_12{4}                          | 5.87                 | 4{1}_6{2}_8{2}_12{1}     |                                         | 0.113                                        | 115.0            |
| NES  | 142.7 | 4.04 | 34.3  | T6          | O13        | T7          | 4{12}_5{128}_6{48}_10{8}_12{40}                  | 6.51                 | 5{2}_6{2}_12{6}          | 0.169                                   | 0.113                                        | 119.5            |
| -PAR | 138.9 | 2.52 | 78.5  | T4          | O1         | T1          | 4{12}_6{20}_8{16}_10{4}                          | 6.46                 | 6{3}_8{2}                | 0.171                                   | 0.114                                        | 184.2            |
| LIO  | 132.1 | 3.92 | 48.5  | T2          | O7         | T3          | 4{18}_6{24}                                      | 5.14                 | 4{1}_6{2}                |                                         | 0.114                                        | 115.6            |
| CAS  | 146.6 | 4.11 | 33.3  | T1          | O3         | T3          | 5{8}_6{16}_8{4}                                  | 6                    | 5{1}_6{2}_8{1}           | 0.17                                    | 0.114                                        | 115.7            |
| MVY  | 130.4 | 3.86 | 52.1  | T1          | O2         | T3          | 4{4}_6{20}_10{2}                                 | 6                    | 4{1}_6{4}_10{1}          |                                         | 0.114                                        | 116.6            |
| OWE  | 145.5 | 4.08 | 34.2  | T2          | O6         | T2          | 4{10}_6{14}_8{14}                                | 6.21                 | 4{2}_8{2}                |                                         | 0.116                                        | 116.9            |
| NSI  | 146.7 | 4.1  | 32.9  | T1          | O1         | T3          | 5{4}_6{8}_8{2}                                   | 6                    | 5{1}_6{2}_8{1}           |                                         | 0.116                                        | 116.7            |
| STF  | 134.3 | 3.95 | 46.4  | T1          | O9         | T3          | 4{6}_5{24}_6{10}_10{2}                           | 5.33                 | 5{2}_6{2}                | 0.178                                   | 0.117                                        | 115.4            |
| MSE  | 139.6 | 4.03 | 41.7  | T2          | O7         | T2          | 4{32}_5{72}_6{28}_10{8}                          | 5.26                 | 4{2}_6{1}                |                                         | 0.117                                        | 114.0            |
| ATV  | 148.2 | 4.13 | 31.5  | T1          | O1         | T1          | 4{4}_6{48}                                       | 5.85                 | 4{1}_6{7}                |                                         | 0.118                                        | 115.8            |
| CAN  | 142.6 | 4.07 | 37.6  | T1          | O3         | T1          | 4{3}_6{8}                                        | 5.45                 | 4{1}_6{1}                | 0.162                                   | 0.119                                        | 114.7            |
| MOZ  | 138.9 | 4.01 | 43.1  | T4          | O7         | T4          | 4{72}_6{30}_8{45}_12{1}                          | 5.68                 | 8{6}_12{1}               |                                         | 0.119                                        | 114.1            |
| NAT  | 140.5 | 4.05 | 41    | T1          | O2         | T1          | 4{20}_8{32}                                      | 6.46                 | 4{3}_8{4}                | 0.179                                   | 0.119                                        | 113.2            |
| -CHI | 125   | 2.22 | 63.4  | T3          | O7         | T4          | 4{8}_5{4}_6{20}_9{4}_10{4}                       | 6.2                  | 4{1}_9{1}_10{1}          | 0                                       | 0.119                                        | 217.0            |
| AWW  | 141.9 | 4.06 | 38.4  | T1          | O3         | T1          | 4{14}_6{12}_8{2}                                 | 5.14                 | 4{1}_6{2}                |                                         | 0.120                                        | 114.7            |
| TON  | 150.9 | 4.15 | 29    | T2          | O4         | T3          | 5{8}_6{18}_10{2}                                 | 6                    | 5{1}_10{1}               | 0.132                                   | 0.121                                        | 116.6            |
| SSY  | 134.8 | 3.94 | 46.7  | T3          | O4         | T4          | 4{2}_5{8}_6{18}_12{2}                            | 6                    | 5{1}_12{1}               | 0.169                                   | 0.123                                        | 115.8            |
| RTH  | 138   | 4    | 42.3  | T2          | O5         | T4          | 4{14}_5{16}_6{4}_8{4}                            | 5.05                 | 4{1}_5{1}_8{1}           | 0.161                                   | 0.124                                        | 115.5            |
| -SVR | 140.6 | 2.83 | 80.5  | T4          | O11        | T5          | 4{4}_5{76}_6{16}_10{20}_11{4}                    | 6.67                 | 5{2}_6{1}_12{1}          |                                         | 0.124                                        | 161.8            |
| IHW  | 131.9 | 3.89 | 49.9  | T7          | O17        | T8          | 4{4}_5{96}_6{48}_8{8}_12{32}                     | 6.55                 | 5{2}_6{2}                |                                         | 0.124                                        | 116.5            |

| FTC | T-O-T | b    | omega | T1<br>label | O<br>label | T2<br>label | ring-size{ring-number}:Ring Count<br>(unit cell) | average<br>ring size | ring index (this T-site)   | BGB energy<br>w.r.t. quartz<br>(eV/TO2) | BS<br>energy<br>w.r.t.<br>quartz<br>(eV/TO2) | Eads<br>(kJ/mol) |
|-----|-------|------|-------|-------------|------------|-------------|--------------------------------------------------|----------------------|----------------------------|-----------------------------------------|----------------------------------------------|------------------|
| UWY | 133.2 | 3.93 | 48.4  | T8          | O21        | T9          | 4{23}_5{20}_6{40}_10{18}                         | 6.06                 | 4{1}_6{4}                  | 0.173                                   | 0.125                                        | 115.0            |
| FAU | 142   | 4.06 | 38.2  | T1          | O4         | T1          | 4{144}_6{64}_12{16}                              | 5.14                 | 4{1}_6{1}_12{1}            | 0.189                                   | 0.126                                        | 114.9            |
| SGT | 136.3 | 3.98 | 44.3  | T1          | O1         | T2          | 4{12}_5{48}_6{16}                                | 5.05                 | 5{2}_6{1}                  |                                         | 0.126                                        | 115.1            |
| OSI | 135.7 | 3.99 | 46.8  | T1          | O1         | T1          | 4{6}_6{32}_12{2}                                 | 6                    | 4{1}_6{1}                  |                                         | 0.127                                        | 112.4            |
| BOG | 136.2 | 3.98 | 44.1  | T3          | O9         | T5          | 4{36}_6{8}_8{48}_10{18}                          | 6.87                 | 4{1}_5{1}_6{2}_10{2}       |                                         | 0.129                                        | 115.3            |
| SBT | 135.9 | 3.97 | 44.7  | T2          | O9         | T3          | 4{108}_6{84}_8{99}_12{60}                        | 6.97                 | 4{1}_6{2}_8{4}_12{6}       |                                         | 0.129                                        | 115.5            |
| TOL | 127.1 | 3.83 | 56.2  | T2          | O7         | T3          | 4{36}_6{48}                                      | 5.14                 | 4{1}_6{2}                  | 0.183                                   | 0.132                                        | 115.2            |
| SBE | 139.5 | 4.03 | 40.9  | T4          | O10        | T3          | 4{96}_6{64}_8{120}_12{8}                         | 6.33                 | 4{1}_6{2}_8{6}_12{1}       |                                         | 0.132                                        | 114.6            |
| AEN | 128.2 | 3.82 | 50.4  | T3          | O9         | T3          | 4{12}_6{80}_8{12}                                | 6                    | 4{1}_6{5}                  | 0.173                                   | 0.133                                        | 120.7            |
| AEI | 146.1 | 4.11 | 33.8  | T1          | O1         | T1          | 4{36}_6{8}_8{12}                                 | 5.14                 | 4{2}_6{1}                  | 0.177                                   | 0.133                                        | 115.2            |
| JOZ | 131.3 | 3.87 | 51.1  | T1          | O1         | T2          | 3{8}_4{4}_8{12}                                  | 5.67                 | 3{1}_4{1}_8{1}             | 0.165                                   | 0.135                                        | 116.8            |
| CON | 137.2 | 3.99 | 43.3  | T2          | O5         | T4          | 4{22}_5{24}_6{28}_10{16}_12{26}                  | 7.31                 | 4{1}_5{1}_6{2}_10{2}_12{1} |                                         | 0.135                                        | 115.3            |
| GIU | 138.1 | 4.02 | 43.5  | T4          | O3         | T4          | 4{48}_6{64}                                      | 5.14                 | 4{2}_6{1}                  |                                         | 0.135                                        | 113.1            |
| APD | 143.7 | 4.08 | 36.7  | T1          | O3         | T1          | 4{12}_6{48}_8{24}                                | 6.29                 | 4{1}_6{4}_8{5}             | 0.15                                    | 0.136                                        | 114.8            |
| MTF | 135.6 | 3.96 | 45.7  | T4          | O11        | T5          | 4{2}_5{32}_6{14}_7{8}_8{6}                       | 5.74                 | 6{3}_7{2}                  | 0.187                                   | 0.136                                        | 115.3            |
| LEV | 142.7 | 4.06 | 37.6  | T1          | O1         | T1          | 4{36}_6{18}_8{9}                                 | 5.14                 | 4{2}_6{1}                  |                                         | 0.138                                        | 115.4            |
| SAF | 137.3 | 3.98 | 44    | T1          | O1         | T1          | 4{12}_6{136}                                     | 5.84                 | 4{1}_6{7}                  |                                         | 0.138                                        | 115.4            |
| VNI | 131.3 | 3.9  | 50    | T3          | O7         | T4          | 3{12}_4{12}_5{32}_8{48}                          | 6.04                 | 3{1}_8{4}                  |                                         | 0.141                                        | 115.7            |
| APC | 134   | 3.95 | 46.9  | T1          | O1         | T1          | 4{20}_6{8}_8{20}                                 | 6                    | 4{1}_8{3}                  |                                         | 0.141                                        | 115.0            |
| JSR | 126.2 | 3.77 | 56.4  | Si1         | O1         | Si3         | 3{48}_4{24}_6{12}_11{24}                         | 5.33                 | 3{1}_4{1}_6{1}             | 0.155                                   | 0.141                                        | 119.0            |
| IFO | 132.8 | 3.92 | 51    | Si1         | O3         | Si1         | 4{10}_6{52}_16{2}                                | 6                    | 6{6}                       |                                         | 0.142                                        | 113.5            |
| ITT | 132.7 | 3.92 | 51    | Si3         | O7         | Si3         | 3{2}_4{18}_5{24}_6{18}_10{6}                     | 5.38                 | 3{1}_5{2}                  | 0.201                                   | 0.142                                        | 113.5            |
| GON | 141.4 | 4.06 | 38.1  | T1          | O1         | T4          | 4{4}_5{8}_6{24}_12{2}                            | 5.89                 | 5{1}_6{3}_12{1}            | 0.165                                   | 0.143                                        | 115.0            |
| IWS | 135.6 | 3.99 | 46.6  | T2          | O15        | T5          | 4{66}_5{48}_6{64}_12{40}                         | 6.28                 | 5{1}_6{2}_12{3}            |                                         | 0.143                                        | 112.5            |
| UOS | 144.3 | 4.08 | 35.8  | T1          | O4         | T3          | 4{12}_5{8}_6{4}_8{8}_10{8}                       | 6.4                  | 5{1}_6{1}_8{2}_10{2}       | 0.17                                    | 0.143                                        | 115.6            |
| PHI | 145.1 | 4.1  | 34.9  | T2          | O6         | T2          | 4{24}_8{16}                                      | 5.6                  | 4{2}_8{1}                  | 0.105                                   | 0.147                                        | 115.0            |
| BOF | 142   | 4.06 | 38.4  | T1          | O2         | T2          | 4{8}_5{8}_6{16}_10{4}                            | 5.78                 | 5{2}_6{2}_10{1}            | 0.195                                   | 0.153                                        | 114.7            |
| AWO | 139.4 | 4.03 | 40.9  | T1          | O3         | T3          | 4{28}_6{16}_8{44}                                | 6.36                 | 4{2}_8{2}                  |                                         | 0.153                                        | 114.6            |
| SFN | 134.9 | 3.94 | 46.9  | T3          | O7         | T8          | 4{4}_5{8}_6{22}_14{2}                            | 6                    | 5{1}_14{1}                 |                                         | 0.154                                        | 115.6            |
| AFY | 128.3 | 3.86 | 54    | T1          | O2         | T1          | 4{15}_8{3}_12{1}                                 | 5.05                 | 4{1}_8{1}_12{1}            |                                         | 0.154                                        | 115.0            |
| WEI | 130.9 | 3.9  | 50    | T1          | O1         | T2          | 3{8}_4{4}_6{4}_8{4}_10{4}                        | 5.67                 | 3{1}_6{1}_10{1}            | 0.205                                   | 0.155                                        | 115.7            |
| AST | 148.3 | 4.13 | 31.5  | T1          | O1         | T1          | 4{24}_6{24}                                      | 5                    | 4{2}_6{1}                  | 0.208                                   | 0.156                                        | 115.8            |
| MOR | 147.6 | 4.12 | 32.2  | T1          | O1         | T1          | 4{4}_5{48}_8{12}_12{4}                           | 5.88                 | 5{2}_8{1}_12{1}            |                                         | 0.159                                        | 115.9            |
| LAU | 141.9 | 4.06 | 38.2  | T2          | O6         | T3          | 4{12}_6{24}_10{8}                                | 6.18                 | 4{1}_6{4}_10{2}            |                                         | 0.159                                        | 114.9            |
| RWY | 116.1 | 3.5  | 73.1  | T1          | O3         | T1          | 3{48}_8{6}_12{8}                                 | 4.65                 | 3{2}_12{1}                 |                                         | 0.160                                        | 123.1            |
| SZR | 149.2 | 4.14 | 30.1  | T1          | O1         | T1          | 4{12}_5{16}_6{8}_8{12}_10{12}                    | 6.53                 | 4{1}_6{2}_10{3}            |                                         | 0.160                                        | 116.3            |
| SBS | 135.8 | 3.97 | 44.7  | T1          | O1         | T2          | 4{72}_6{56}_8{66}_12{40}                         | 6.97                 | 4{1}_6{2}_8{4}_12{6}       |                                         | 0.162                                        | 115.5            |
| SFH | 136.5 | 3.96 | 44.5  | T4          | O10        | T7          | 4{8}_5{16}_6{44}_14{4}                           | 6                    | 5{1}_14{1}                 |                                         | 0.164                                        | 116.3            |
| BRE | 139.9 | 4.03 | 40.4  | T1          | O4         | T3          | 4{6}_5{8}_6{2}_8{4}                              | 5.4                  | 4{1}_5{1}_8{2}             |                                         | 0.165                                        | 115.1            |

| FTC  | T-O-T | b    | omega | T1<br>label | O<br>label | T2<br>label | ring-size{ring-number}:Ring Count<br>(unit cell) | average<br>ring size | ring index (this T-site) | BGB energy<br>w.r.t. quartz<br>(eV/TO2) | BS<br>energy<br>w.r.t.<br>quartz<br>(eV/TO2) | Eads<br>(kJ/mol) |
|------|-------|------|-------|-------------|------------|-------------|--------------------------------------------------|----------------------|--------------------------|-----------------------------------------|----------------------------------------------|------------------|
| AFG  | 139.1 | 4.02 | 41.5  | T1          | O3         | T1          | 4{24}_6{32}                                      | 5.14                 | 4{2}_6{1}                | 0.211                                   | 0.168                                        | 114.8            |
| DAC  | 143.7 | 4.08 | 36.2  | T2          | O7         | T4          | 4{2}_5{24}_8{4}_10{8}                            | 6.32                 | 5{3}_8{1}_10{2}          |                                         | 0.169                                        | 115.2            |
| USI  | 133.2 | 3.94 | 48.5  | T2          | O5         | T3          | 4{26}_6{40}_10{4}_12{8}                          | 6.15                 | 4{2}_6{1}_12{2}          |                                         | 0.169                                        | 114.3            |
| LOS  | 139.1 | 4.02 | 41.6  | T1          | O1         | T1          | 4{12}_6{16}                                      | 5.14                 | 4{2}_6{1}                | 0.206                                   | 0.169                                        | 114.7            |
| PCR  | 141.1 | 4.06 | 39.1  | T1          | O1         | T7          | 5{56}_6{20}_8{4}_10{24}_12{4}                    | 6.67                 | 5{3}_6{1}_10{2}          |                                         | 0.170                                        | 114.1            |
| BCT  | 160.1 | 4.22 | 19.1  | T1          | O2         | T1          | 4{2}_6{8}                                        | 5.6                  | 4{1}_6{2}                |                                         | 0.170                                        | 120.2            |
| CGS  | 138.8 | 4.02 | 41.6  | T3          | O9         | T4          | 4{24}_6{4}_8{32}_10{4}                           | 6.5                  | 4{1}_8{5}_10{1}          | 0.208                                   | 0.170                                        | 114.7            |
| SFV  | 134.1 | 3.94 | 45.7  | T1          | O4         | T6          | {107}_5{632}_6{240}_8{106}_10{18}                | 6.12                 | 10{1}                    | 0.198                                   | 0.171                                        | 116.6            |
| UTL  | 130.1 | 3.89 | 53    | T1          | O1         | T7          | 4{12}_5{72}_6{12}_12{4}_14{20}                   | 6.73                 | 5{2}_12{1}_14{5}         |                                         | 0.181                                        | 113.9            |
| LTA  | 145.2 | 4.1  | 34.8  | Si1         | O2         | Si1         | 4{18}_6{8}_8{3}                                  | 4.97                 | 4{2}_6{1}                | 0.23                                    | 0.181                                        | 115.1            |
| MEL  | 141.2 | 4.04 | 38.9  | T3          | O9         | T3          | 4{10}_5{80}_6{32}_8{12}_10{24}                   | 6.13                 | 5{2}_10{4}               |                                         | 0.187                                        | 115.6            |
| DFO  | 133.8 | 3.95 | 46    | T1          | O1         | T1          | 4{84}_6{144}_8{6}_10{6}_12{3}                    | 5.53                 | 4{2}_12{1}               |                                         | 0.189                                        | 115.7            |
| IWR  | 139   | 4.03 | 43    | T4          | O3         | T4          | 4{26}_5{16}_6{32}_10{16}_12{32}                  | 7.54                 | 4{1}_6{4}                |                                         | 0.190                                        | 112.9            |
| BSV  | 130.1 | 3.88 | 52.8  | T1          | O1         | T1          | 4{72}_6{16}_12{2352}                             | 11.72                | 4{2}_12{147}             |                                         | 0.193                                        | 114.7            |
| -LIT | 145.6 | 2.48 | 49.2  | T1          | O3         | T2          | 4{8}_6{8}_8{12}                                  | 6.29                 | 4{1}_6{1}_8{1}           | 0.174                                   | 0.194                                        | 211.5            |
| DDR  | 138.2 | 4.03 | 42.9  | T1          | O3         | T1          | 4{18}_5{108}_6{6}_8{9}                           | 5.11                 | 4{1}_5{2}                |                                         | 0.194                                        | 113.0            |
| CDO  | 147.8 | 4.06 | 32.8  | T2          | O6         | T2          | 5{40}_8{12}                                      | 5.69                 | 5{2}                     | 0.074                                   | 0.199                                        | 119.4            |
| SAV  | 143.2 | 4.11 | 37.3  | T1          | O9         | T1          | 4{36}_6{8}_8{12}                                 | 5.14                 | 4{1}_8{2}                | 0.199                                   | 0.209                                        | 112.3            |
| ASV  | 132.9 | 3.97 | 48.5  | T1          | O1         | T2          | 4{12}_6{12}_12{28}                               | 8.77                 | 6{3}_12{14}              |                                         | 0.221                                        | 112.3            |
| UFI  | 137.3 | 3.96 | 42.4  | T2          | O6         | T2          | 4{36}_5{16}_6{16}_8{8}                           | 5.05                 | 4{1}_5{1}_8{1}           | 0.224                                   | 0.222                                        | 118.1            |
| EON  | 140.2 | 4.04 | 41.3  | T1          | O10        | T1          | 4{20}_5{36}_6{2}_8{18}_12{4}                     | 5.8                  | 4{2}_12{1}               | 0.233                                   | 0.228                                        | 113.6            |
| HEU  | 139.9 | 4.03 | 40.1  | T1          | O1         | T5          | 4{12}_5{24}_8{6}_10{4}                           | 5.57                 | 5{3}_10{1}               | 0.257                                   | 0.233                                        | 115.3            |
| BPH  | 138.8 | 4.02 | 41.4  | T1          | O1         | T2          | 4{21}_6{10}_8{12}_12{2}                          | 5.87                 | 4{1}_6{2}_8{2}_12{1}     |                                         | 0.234                                        | 114.9            |
| THO  | 140.3 | 4.08 | 40    | T1          | O2         | T2          | 4{10}_8{18}                                      | 6.57                 | 4{3}_8{5}                | 0.253                                   | 0.234                                        | 112.0            |
| ACO  | 148.4 | 4.13 | 31.5  | T1          | O2         | T1          | 4{12}_8{12}                                      | 6                    | 4{2}_8{2}                | 0.229                                   | 0.238                                        | 115.8            |
| STT  | 129.1 | 3.86 | 51.7  | T3          | O1         | T4          | 4{24}_5{32}_6{16}_7{4}_9{4}                      | 5.2                  | 5{2}_6{1}                | 0                                       | 0.257                                        | 117.0            |
| LTF  | 140.9 | 4.04 | 39.6  | T1          | O2         | T2          | 4{60}_5{24}_6{12}_8{36}_12{2}                    | 5.55                 | 4{2}_8{1}                | 0.25                                    | 0.275                                        | 115.1            |
| ITH  | 141.5 | 4.05 | 39.2  | T6          | O3         | T7          | 4{18}_5{20}_6{40}_9{8}_10{8}                     | 6                    | 5{2}_9{2}_10{1}          | 0.293                                   | 0.286                                        | 114.7            |
| UOZ  | 132.9 | 3.93 | 48.5  | T2          | O4         | T4          | 4{24}_6{24}_12{28}                               | 7.58                 | 6{3}_12{14}              |                                         | 0.319                                        | 115.0            |
| SOD  | 160.3 | 4.23 | 19.2  | T1          | O1         | T1          | 4{6}_6{8}                                        | 5.14                 | 4{1}_6{2}                | 0.282                                   | 0.331                                        | 119.5            |
| SFW  | 145.9 | 4.11 | 34    | Si1         | O3         | Si1         | 4{81}_6{18}_8{27}                                | 5.14                 | 4{2}_6{1}                | 0.339                                   | 0.334                                        | 115.1            |
| CFI  | 137.5 | 4.02 | 44.8  | T1          | O6         | T1          | 4{2}_5{12}_6{20}_14{2}                           | 6                    | 4{1}_5{1}                | 0.358                                   | 0.363                                        | 112.0            |
| MSO  | 144.8 | 4.09 | 35.2  | T2          | O8         | T2          | 4{36}_6{93}                                      | 5.44                 | 4{1}_6{3}                |                                         | 0.407                                        | 115.4            |
| EPI  | 136.5 | 3.98 | 44.3  | T1          | O1         | T3          | 4{2}_5{24}_8{4}_10{8}                            | 6.32                 | 5{3}_8{1}_10{2}          |                                         | 0.419                                        | 115.1            |
| BIK  | 150.6 | 4.15 | 29    | T1          | O3         | T1          | 5{4}_6{8}_8{2}                                   | 6                    | 5{1}_8{1}                | 0.403                                   | 0.451                                        | 116.6            |
| MAZ  | 140.6 | 4.04 | 39.6  | T1          | O3         | T1          | 4{18}_5{12}_6{2}_8{12}_12{2}                     | 5.74                 | 4{2}_12{1}               |                                         | 0.455                                        | 115.1            |
| ANA  | 148.8 | 4.13 | 31.2  | T1          | O1         | T1          | 4{24}_6{16}_8{96}                                | 7.06                 | 4{1}_6{1}_8{8}           |                                         | 0.477                                        | 116.1            |
| MRE  | 141.4 | 4.02 | 39.3  | T3          | O1         | T3          | 4{4}_5{16}_6{60}                                 | 5.7                  | 6{4}                     |                                         | 0.509                                        | 116.6            |
| LTL  | 138.2 | 4    | 42.8  | T2          | O5         | T2          | 4{24}_6{10}_8{18}_12{1}                          | 5.89                 | 8{6}_12{1}               | 0.482                                   | 0.523                                        | 115.0            |

| FTC | T-O-T | b    | omega | T1<br>label | O<br>label | T2<br>label | ring-size{ring-number}:Ring Count<br>(unit cell) | average<br>ring size | ring index (this T-site) | BGB energy<br>w.r.t. quartz<br>(eV/TO2) | BS<br>energy<br>w.r.t.<br>quartz<br>(eV/TO2) | Eads<br>(kJ/mol) |
|-----|-------|------|-------|-------------|------------|-------------|--------------------------------------------------|----------------------|--------------------------|-----------------------------------------|----------------------------------------------|------------------|
| MWW | 141.1 | 4.05 | 39.8  | T1          | O3         | T4          | 4{24}_5{48}_6{38}_10{18}                         | 5.81                 | 5{2}_6{2}_10{2}          |                                         | 0.538                                        | 114.2            |
| EDI | 140.4 | 4.03 | 40    | T1          | O2         | T1          | 4{5}_8{9}                                        | 6.57                 | 4{3}_8{5}                |                                         | 0.568                                        | 115.4            |
| ETR | 137.3 | 3.98 | 44    | Si1         | O1         | Si3         | 4{36}_6{8}_8{48}_10{18}                          | 6.87                 | 4{1}_8{5}_10{5}          |                                         | 0.618                                        | 115.4            |
| ERI | 142.1 | 4.06 | 38.1  | T1          | O3         | T1          | 4{24}_6{12}_8{6}                                 | 5.14                 | 4{2}_6{1}                | 0.574                                   | 0.648                                        | 115.0            |
| TER | 142.9 | 4.07 | 37.5  | T2          | O5         | T7          | 4{16}_5{48}_6{56}_10{36}                         | 6.41                 | 5{1}_6{2}_10{3}          | 1.075                                   | 1.105                                        | 114.8            |
| RRO | 127.1 | 3.82 | 55.7  | T2          | O6         | T4          | 4{6}_5{12}_8{2}_10{8}                            | 6.43                 | 4{1}_5{1}_8{1}_10{1}     |                                         |                                              | 116.3            |
| TUN | 142.3 | 4.05 | 37.4  | T8          | O34        | T8          | 4{20}_5{168}_6{52}_8{12}_10{36}                  | 6.24                 | 6{3}_8{1}_10{2}          |                                         |                                              | 116.2            |
| PAU | 146.6 | 4.11 | 33.4  | T1          | O1         | T7          | 4{504}_6{24}_8{300}                              | 5.51                 | 4{2}_8{1}                |                                         |                                              | 115.6            |
| EAB | 144.1 | 4.08 | 35.9  | T1          | O2         | T1          | 4{24}_6{12}_8{6}                                 | 5.14                 | 4{2}_6{1}                |                                         |                                              | 115.5            |
| STO | 139.6 | 4.01 | 41.5  | T5          | O39        | T5          | 4{22}_5{32}_6{130}_8{4}                          | 5.64                 | 6{4}_8{1}                |                                         |                                              | 115.5            |
| RTE | 143   | 4.07 | 36.9  | T2          | O5         | T3          | 4{10}_5{8}_6{8}_8{2}                             | 5.14                 | 4{1}_5{1}_6{1}           |                                         |                                              | 115.3            |
| SFO | 141.5 | 4.05 | 38.9  | T1          | O6         | T3          | 4{22}_6{24}_8{4}_12{2}                           | 5.54                 | 4{2}_6{3}                |                                         |                                              | 115.0            |
| ITR | 142.4 | 4.06 | 38.2  | T1          | O4         | T3          | 4{36}_5{40}_6{80}_9{16}_10{16}                   | 6                    | 5{2}_9{2}_10{1}          |                                         |                                              | 114.9            |
| SVV | 137.7 | 4    | 43.2  | Si3         | O7         | Si4         | 4{24}_5{16}_6{24}_8{2}                           | 5.09                 | 4{1}_5{1}_6{1}           |                                         |                                              | 114.7            |
| ISV | 137.8 | 4    | 43.4  | T2          | O7         | T2          | 4{28}_5{32}_6{16}_12{36}                         | 7.14                 | 4{2}_6{1}_12{1}          |                                         |                                              | 114.5            |
| SEW | 136.1 | 3.97 | 46.7  | Si6         | O22        | Si6         | 4{26}_5{22}_6{38}_10{4}_12{4}                    | 5.64                 | 4{2}_6{1}                |                                         |                                              | 113.8            |
| ITE | 137.8 | 4.05 | 42.5  | T2          | O7         | T4          | 4{28}_5{32}_6{8}_8{8}                            | 5.05                 | 4{1}_5{1}_8{1}           |                                         |                                              | 112.0            |
